# Supplementary material for: Monolithic porous carbon membrane-based hybrid electrodes with ultrahigh mass loading carbon-encapsulated Co nanoparticles for high-performance supercapacitors
Source: Royal Society of Chemistry journal article supplement (doi:10.1039/d3nj05522a), 2024-01-01
Supplement: d3nj05522a1.pdf [file d3nj05522a1.pdf]

## Electronic Supplementary Information

### **Monolithic porous carbon membrane-based hybrid electrodes with ultrahigh mass loading carbon-encapsulated Co nanoparticles for high-performance supercapacitors**

Zhicheng Wei,<sup>a,b,c</sup> Zhengguo Zhang,<sup>a,b,c</sup> Fang Wang,<sup>a,b,c</sup> Shixiong Min<sup>\*a,b,c</sup>

*<sup>a</sup>School of Chemistry and Chemical Engineering, North Minzu University, Yinchuan, 750021, P. R. China.*

*<sup>b</sup>Key Laboratory of Chemical Engineering and Technology, State Ethnic Affairs Commission, North Minzu University, Yinchuan, 750021, P. R. China.*

*<sup>c</sup>Ningxia Key Laboratory of Solar Chemical Conversion Technology, North Minzu University, Yinchuan 750021, P. R. China.*

\*Corresponding authors: [sxmin@nun.edu.cn](mailto:sxmin@nun.edu.cn)

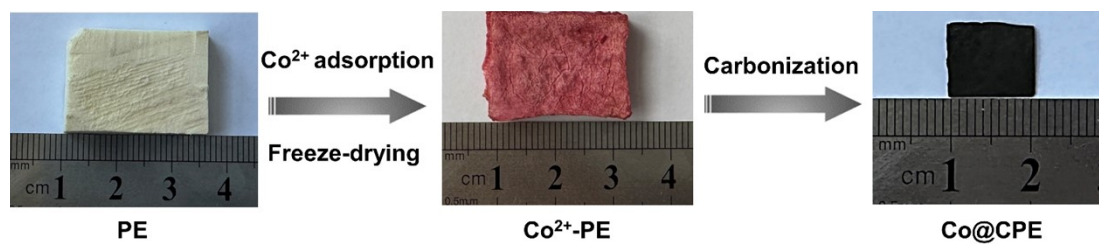

**Fig. S1** Photographs showing the fabrication process of the Co@CPE electrodes.

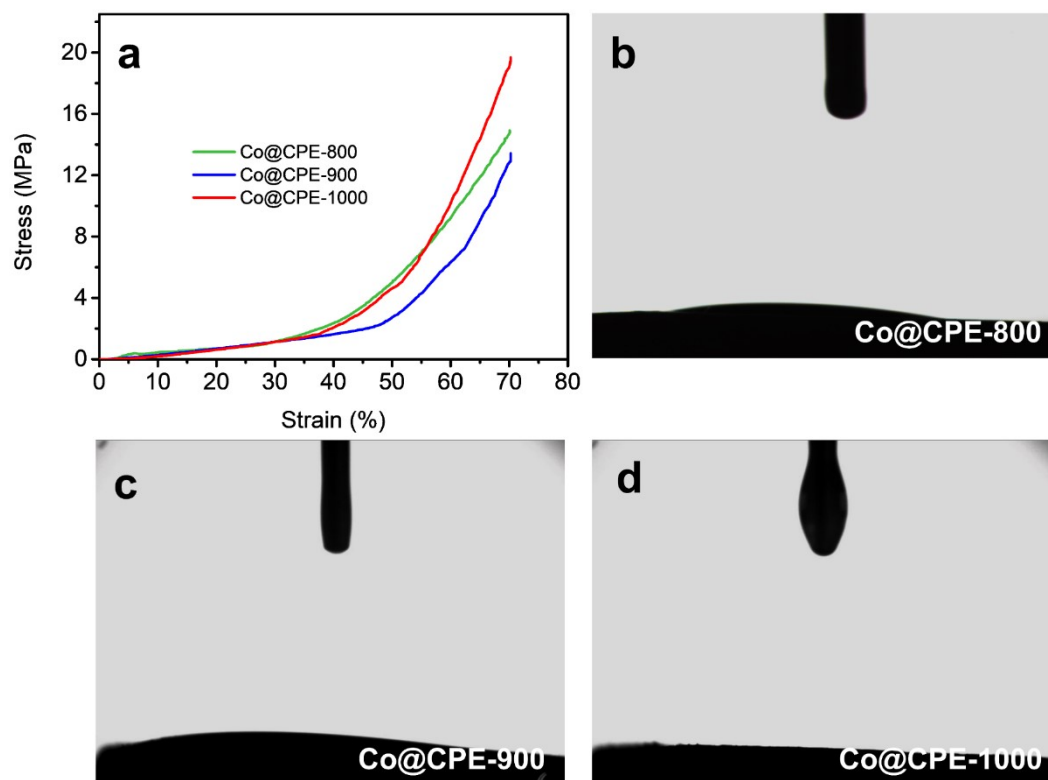

**Fig. S2** (a) Compressive stress-strain curves and (b, c, and d) electrolyte wettability tests of the Co@CPE electrodes.

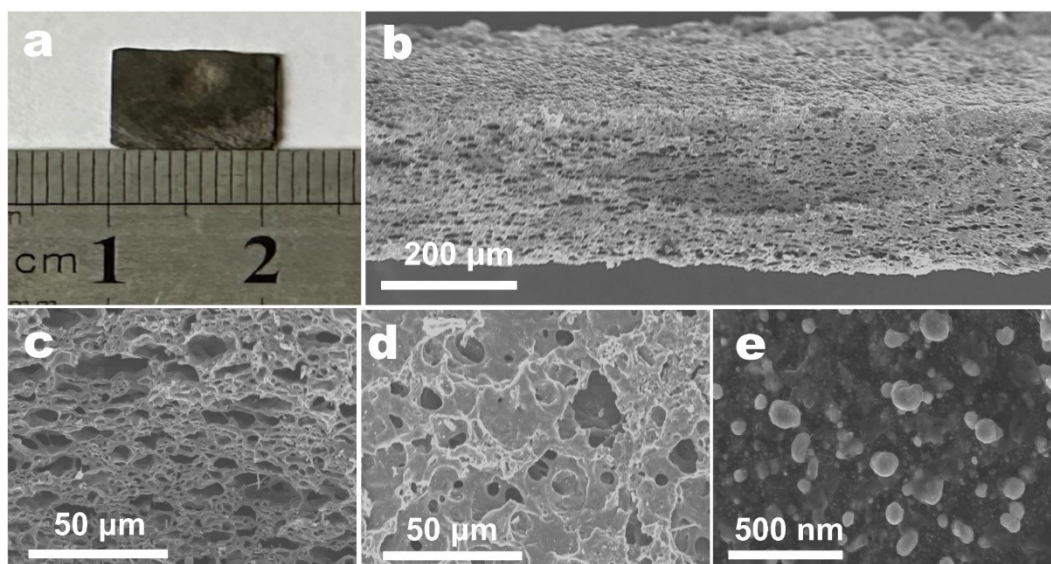

**Fig. S3** (a) Photograph Co@CPE-800 electrode. (b) SEM image showing the overall view of Co@CPE-800 electrode. SEM images of (c) cross section and (d) top surface of Co@CPE-800 electrode. (e) High-magnification SEM image of Co@CPE-800 electrode.

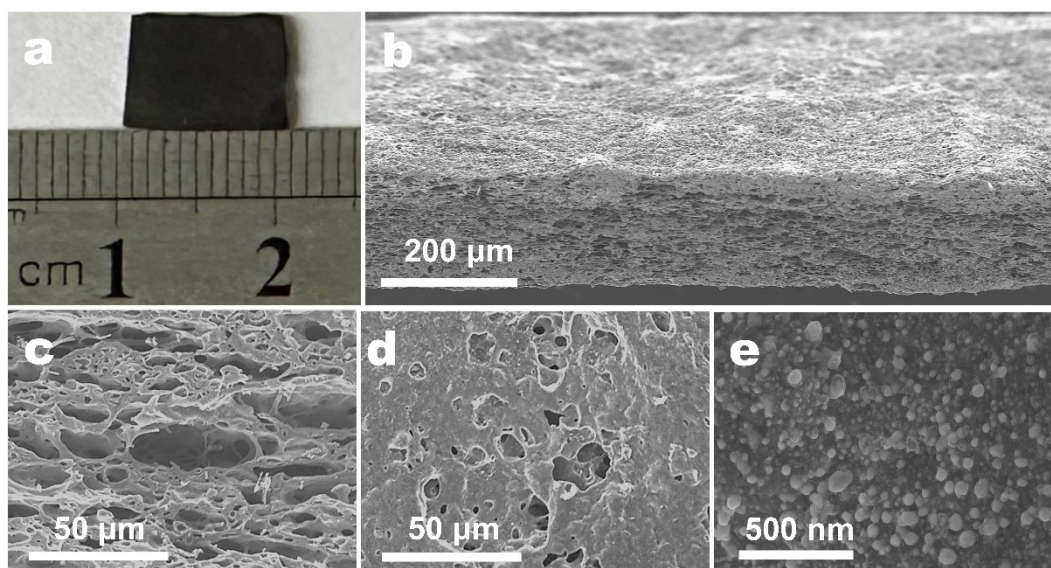

**Fig. S4** (a) Photograph Co@CPE-900 electrode. (b) SEM image showing the overall view of Co@CPE-900 electrode. SEM images of (c) cross section and (d) top surface of Co@CPE-900 electrode. (e) High-magnification SEM image of Co@CPE-900 electrode.

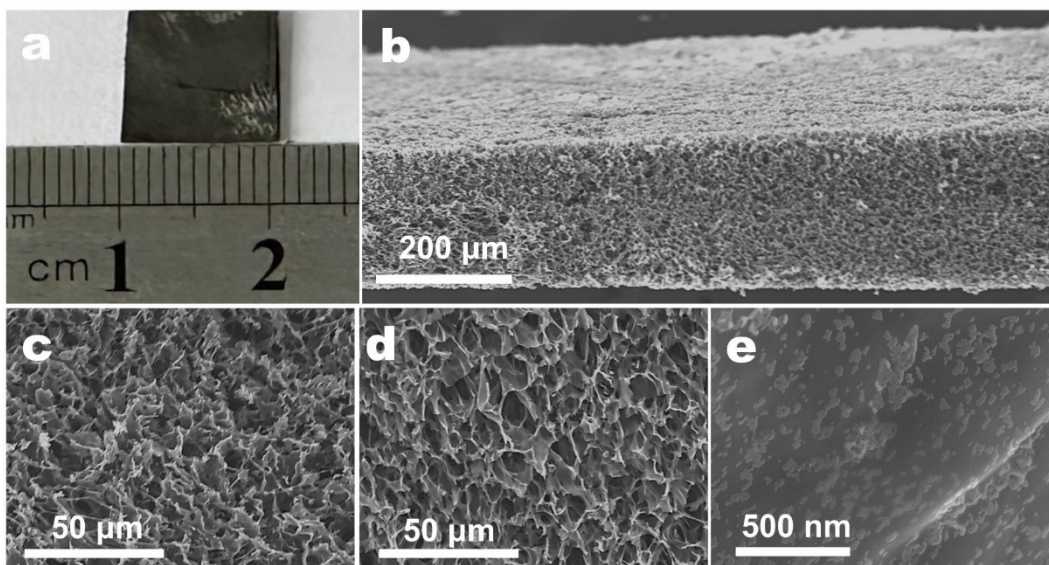

**Fig. S5** (a) Photograph CPE-800 electrode. (b) SEM image showing the overall view of CPE-800 electrode. SEM images of (c) cross section and (d) top surface of CPE-800 electrode. (e) High-magnification SEM image of CPE-800 electrode.

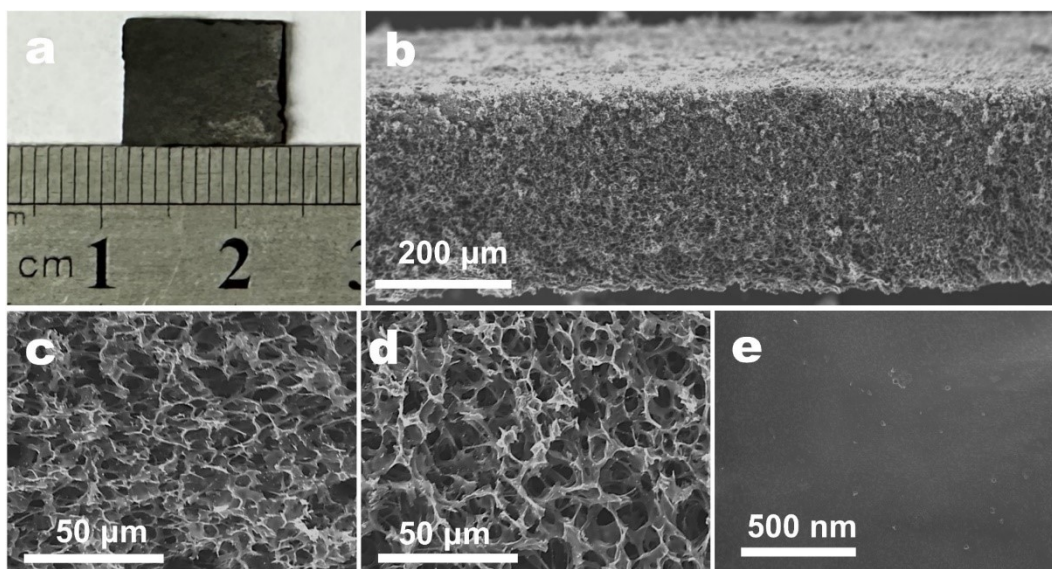

**Fig. S6** (a) Photograph CPE-900 electrode. (b) SEM image showing the overall view of CPE-900 electrode. SEM images of (c) cross section and (d) top surface of CPE-900 electrode. (e) High-magnification SEM image of CPE-900 electrode.



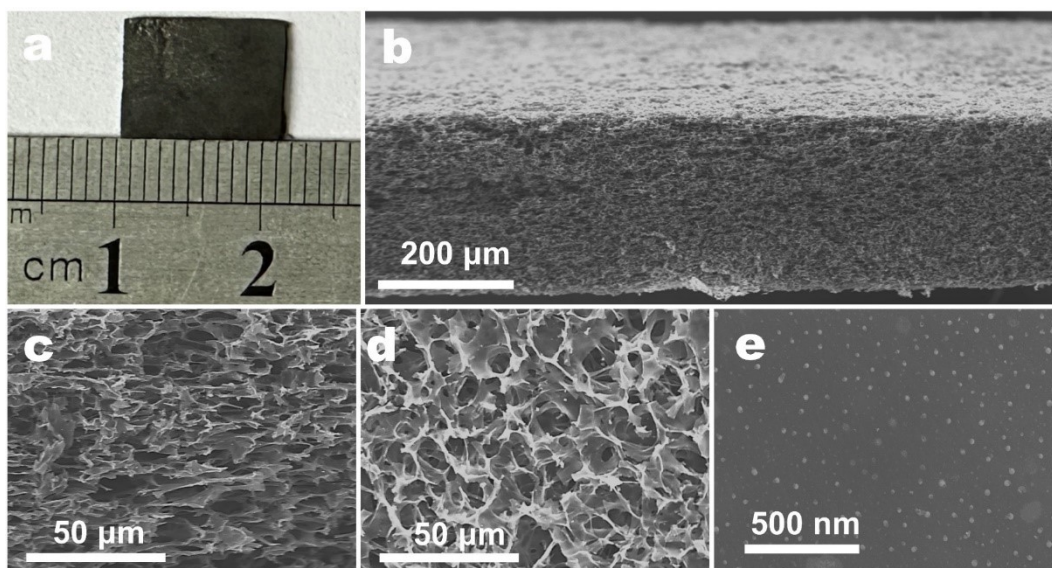

**Fig. S7** (a) Photograph CPE-1000 electrode. (b) SEM image showing the overall view of CPE-1000 electrode. SEM images of (c) cross section and (d) top surface of CPE-1000 electrode. (e) High-magnification SEM image of CPE-1000 electrode.

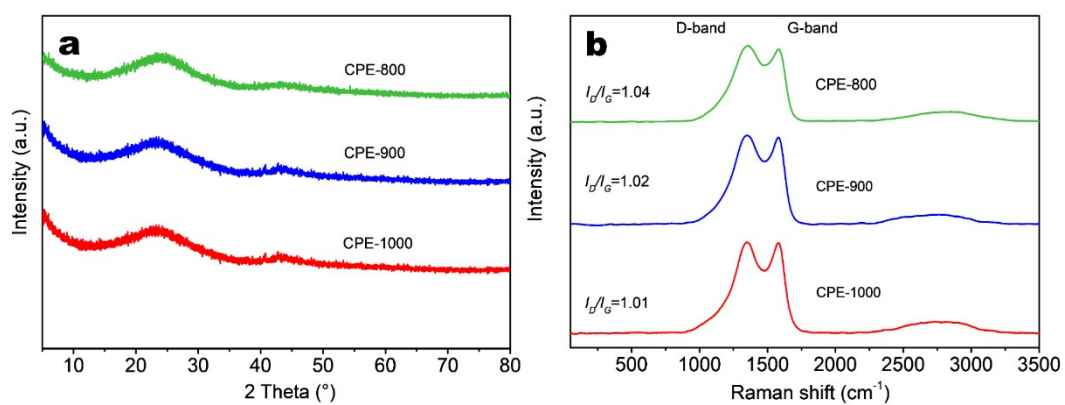

**Fig. S8** (a) XRD patterns and (b) Raman spectra of the CPE electrodes.

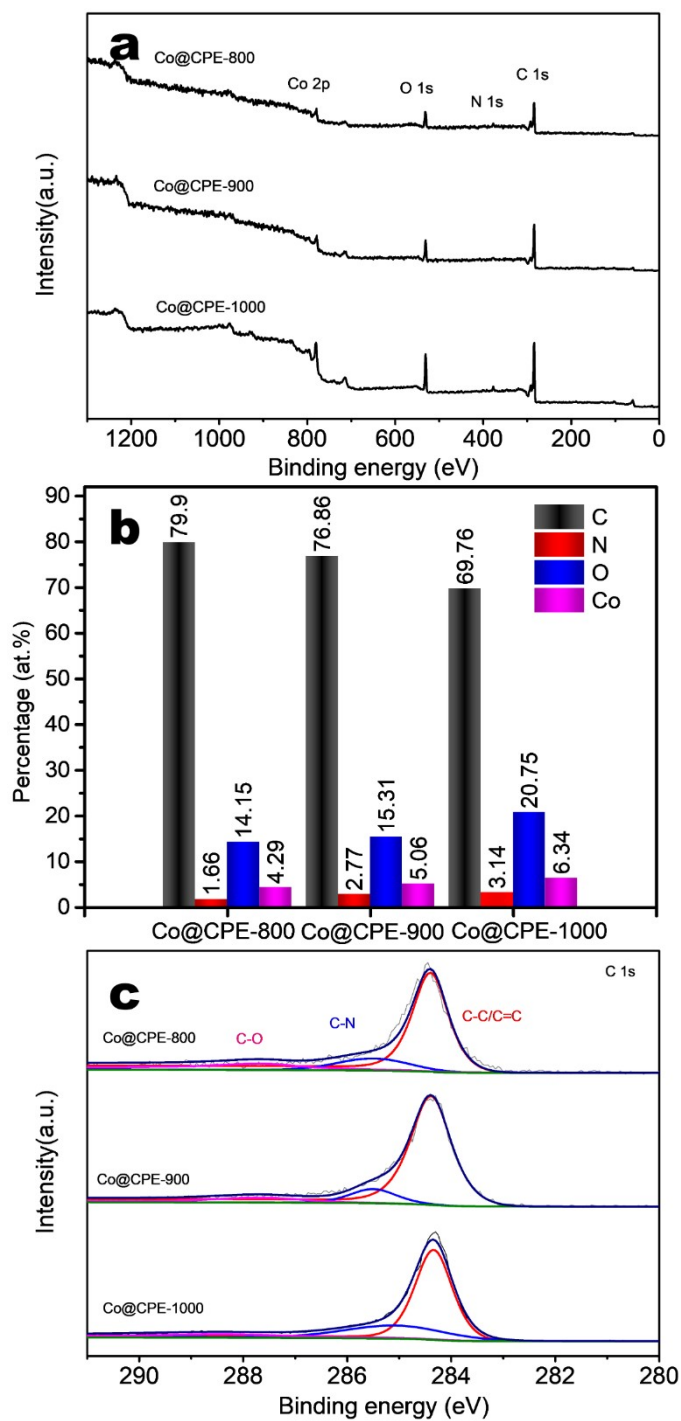

**Fig. S9** (a) XPS survey spectra of the Co@CPE electrodes. (b) The percentages of C, O, N, and Co elements of the Co@CPE electrodes. (c) C 1s XPS spectra of the Co@CPE electrodes.

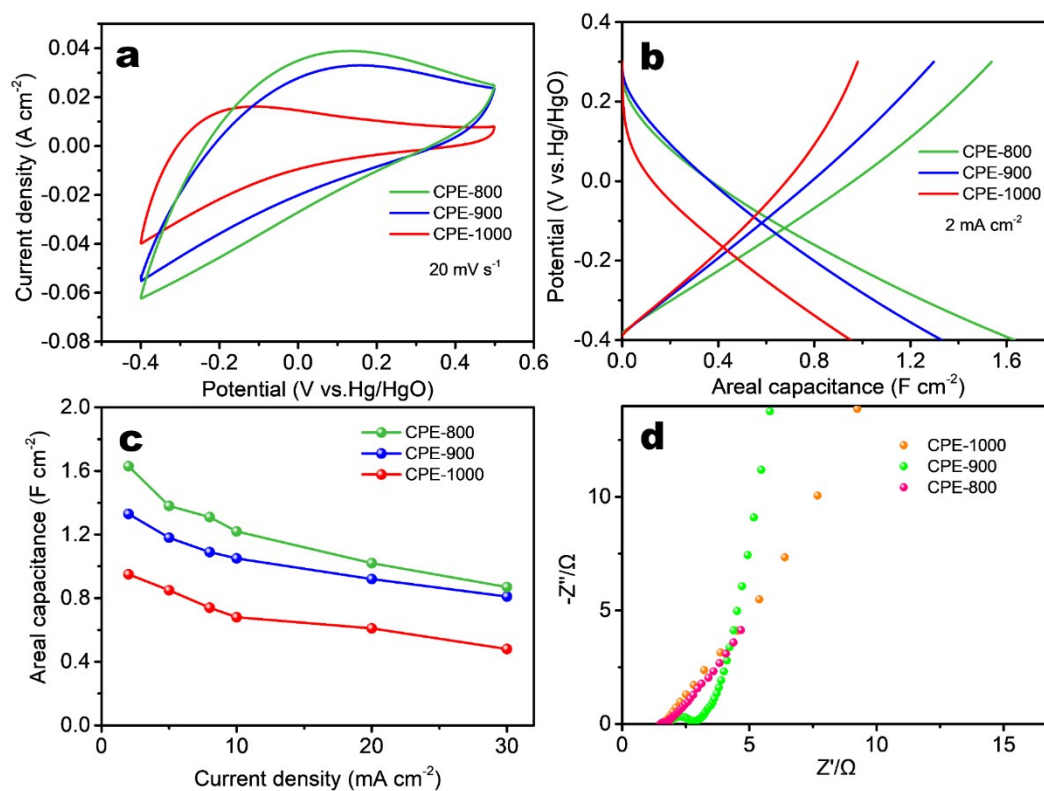

**Fig. S10** (a) CV curves and (b) GCD curves of the CPE electrodes. (c) The areal capacitances of the CPE electrodes at different current densities. (d) EIS Nyquist plots of the CPE electrodes.

**Table S1** Comparison of electrochemical performance of the Co@CPE-1000 electrode with those of previously reported transition metal-based electrodes.

| Electrode material        | Electrolyte | $C_a$ (F cm <sup>-2</sup> )                           | Cycling stability        | Ref       |
|---------------------------|-------------|-------------------------------------------------------|--------------------------|-----------|
| Co-MOF/NF                 | 2 M KOH     | 13.6 F cm <sup>-2</sup><br>(2 mA cm <sup>-2</sup> )   | 69.7%<br>(2000 cycles)   | 1         |
| Co-MOF/NF                 | 3 M KOH     | 0.24 F cm <sup>-2</sup><br>(0.5 mA cm <sup>-2</sup> ) | 70%<br>(1500 cycles)     | 2         |
| Co-Zn, Co-Cu(NF)          | 6 M KOH     | 2.39 F cm <sup>-2</sup><br>(5 mA cm <sup>-2</sup> )   | 76.5 %<br>(3000 cycles)  | 3         |
| Co-PC@MX-CNF              | 2 M KOH     | 0.11 F cm <sup>-2</sup><br>(2 mA cm <sup>-2</sup> )   | 90.36%<br>(10000 cycles) | 4         |
| Fe-Co/NPC                 | 6 M KOH     | 0.9 F cm <sup>-2</sup><br>(10 mA cm <sup>-2</sup> )   | 88%<br>(5000 cycles)     | 5         |
| Ni(OH) <sub>2</sub> @Co/C | 1 M KOH     | 1.73 F cm <sup>-2</sup><br>(1 mA cm <sup>-2</sup> )   | 97.3%<br>(1000 cycles)   | 6         |
| Co@C/Gro                  | 6 M KOH     | 0.8 F cm <sup>-2</sup><br>(0.5 mA cm <sup>-2</sup> )  | 87.3%<br>(10000 cycles)  | 7         |
| NiTe:Co(NF)               | 3 M KOH     | 2.96 F cm <sup>-2</sup><br>(2 mA cm <sup>-2</sup> )   | 95%<br>(5000 cycles)     | 8         |
| Co-MOF/CC                 | 2 M KOH     | 1.17 F cm <sup>-2</sup><br>(1 mA cm <sup>-2</sup> )   | 94%<br>(20000 cycles)    | 9         |
| Ni/Co-MOF@CS              | 1 M KOH     | 2.04 F cm <sup>-2</sup><br>(2.5 mA cm <sup>-2</sup> ) | 73%<br>(5000 cycles)     | 10        |
| Co-MOFs/NF                | 3 M KOH     | 3.83 F cm <sup>-2</sup><br>(2 mA cm <sup>-2</sup> )   | 92.3%<br>(3000 cycles)   | 11        |
| Co@CPE-1000               | 6 M KOH     | 5.04 F cm <sup>-2</sup><br>(2 mA cm <sup>-2</sup> )   | 113%<br>(40000 cycles)   | This work |



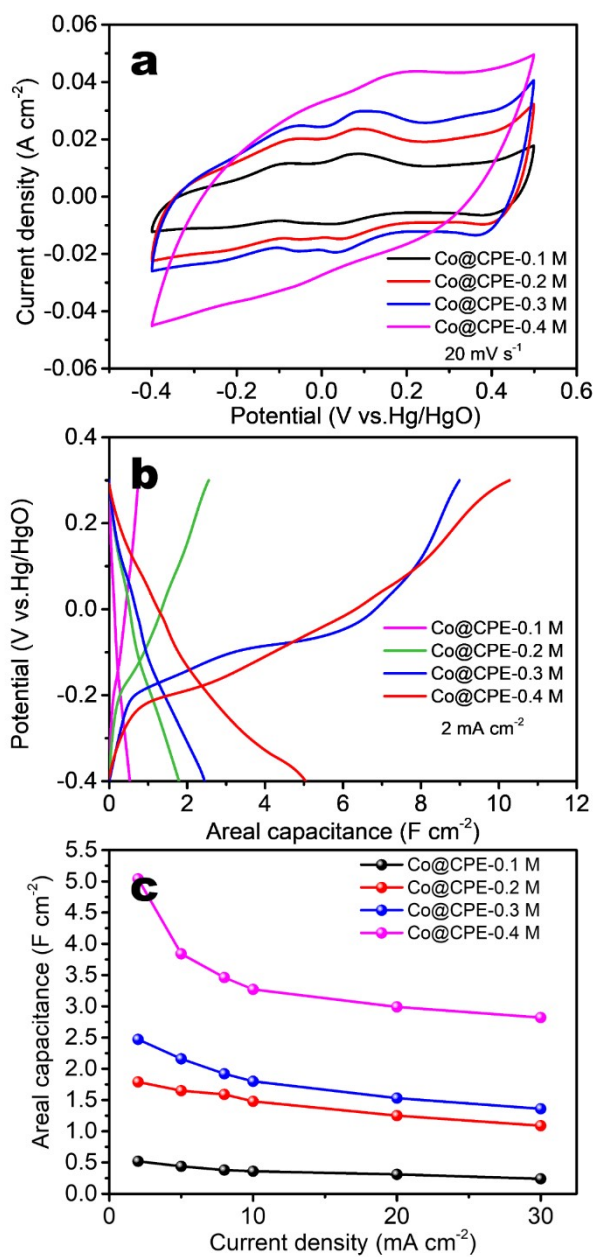

**Fig. S11** (a) CV curves, (b) GCD curves, and (c) areal capacitances of the Co@CPE-1000 electrodes prepared using different concentrations of Co salt.

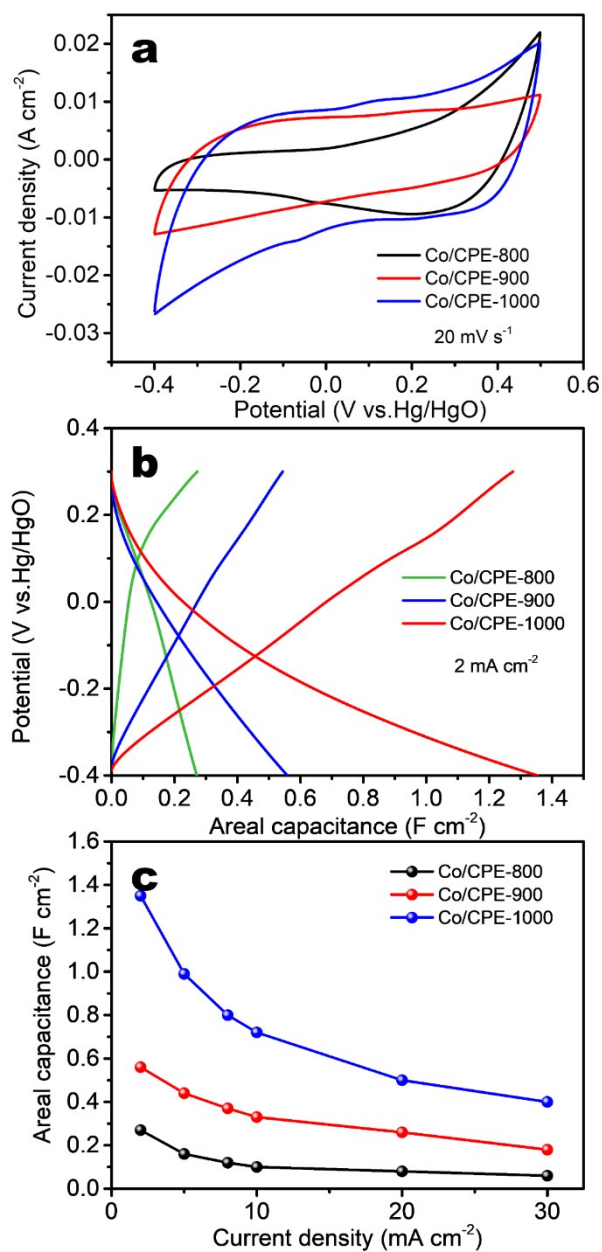

**Fig. S12** (a) CV curves, (b) GCD curves, and (c) areal capacitances of the physically mixed Co/CPE electrodes.

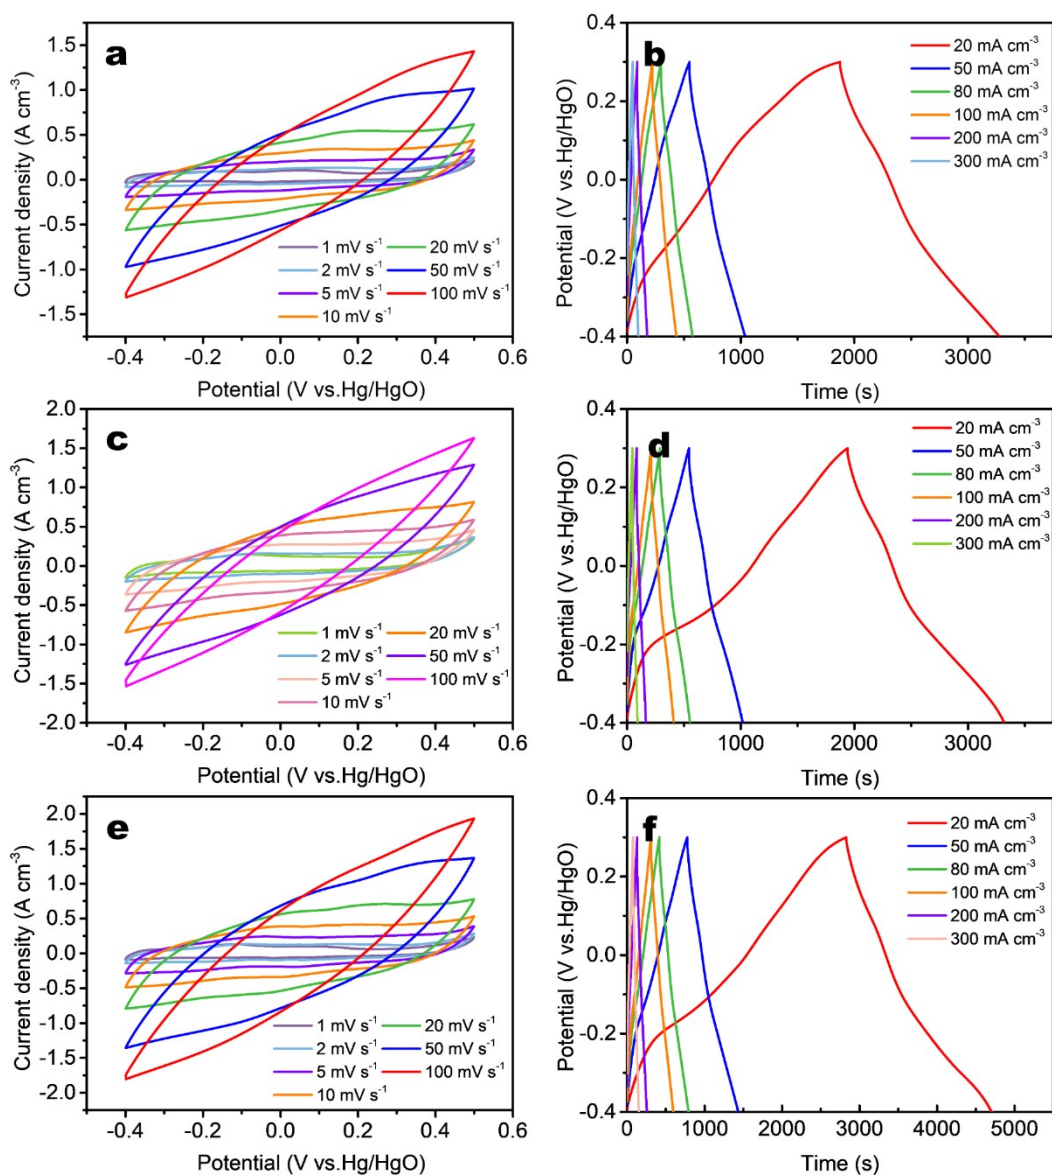

**Fig. S13** (a) CV curves of Co@CPE-800 electrode at different scan rates. (b) GCD curves of Co@CPE-800 electrode at different current densities. (c) CV curves of Co@CPE-900 electrode at different scan rates. (d) GCD curves of Co@CPE-900 electrode at different current densities. (e) CV curves of Co@CPE-1000 electrode at different scan rates. (f) GCD curves of Co@CPE-1000 electrode at different current densities.

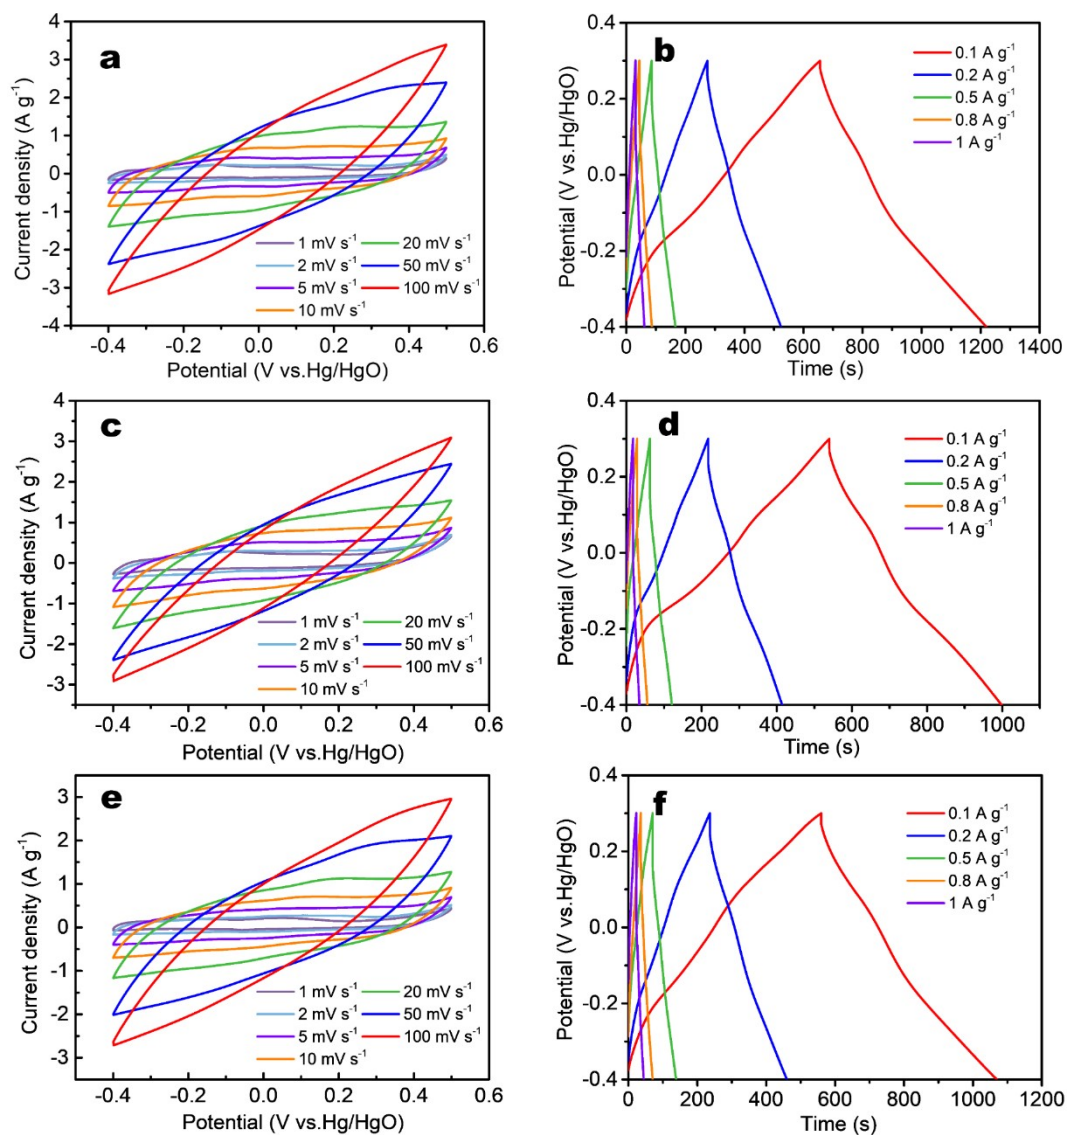

**Fig. S14** (a) CV curves of Co@CPE-800 electrode at different scan rates. (b) GCD curves of Co@CPE-800 electrode at different current densities. (c) CV curves of Co@CPE-900 electrode at different scan rates. (d) GCD curves of Co@CPE-900 electrode at different current densities. (e) CV curves of Co@CPE-1000 electrode at different scan rates. (f) GCD curves of Co@CPE-1000 electrode at different current densities.

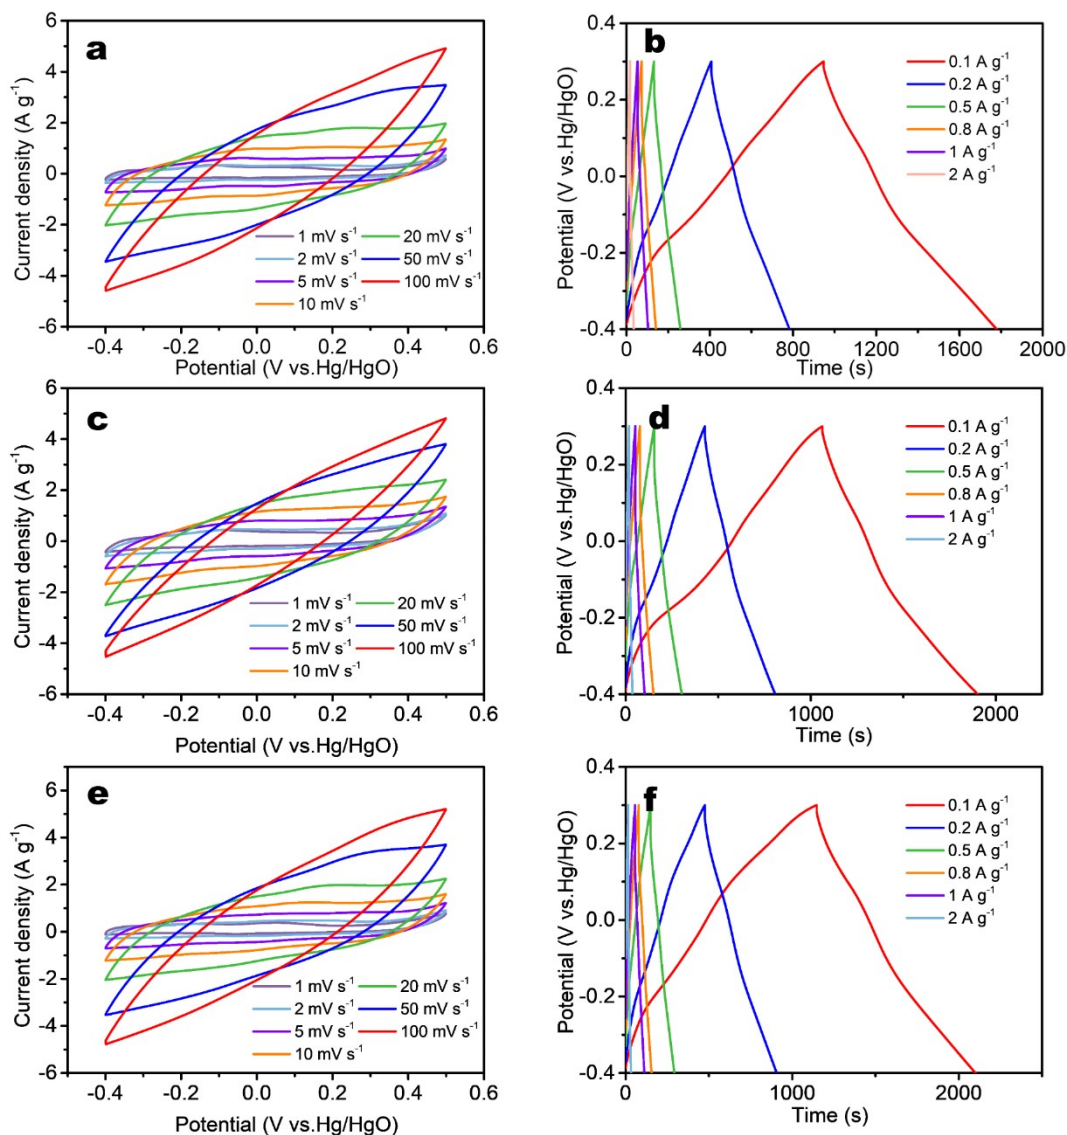

**Fig. S15** (a) CV curves of Co@CPE-800 electrode at different scan rates. (b) GCD curves of Co@CPE-800 electrode at different current densities. (c) CV curves of Co@CPE-900 electrode at different scan rates. (d) GCD curves of Co@CPE-900 electrode at different current densities. (e) CV curves of Co@CPE-1000 electrode at different scan rates. (f) GCD curves of Co@CPE-1000 electrode at different current densities.



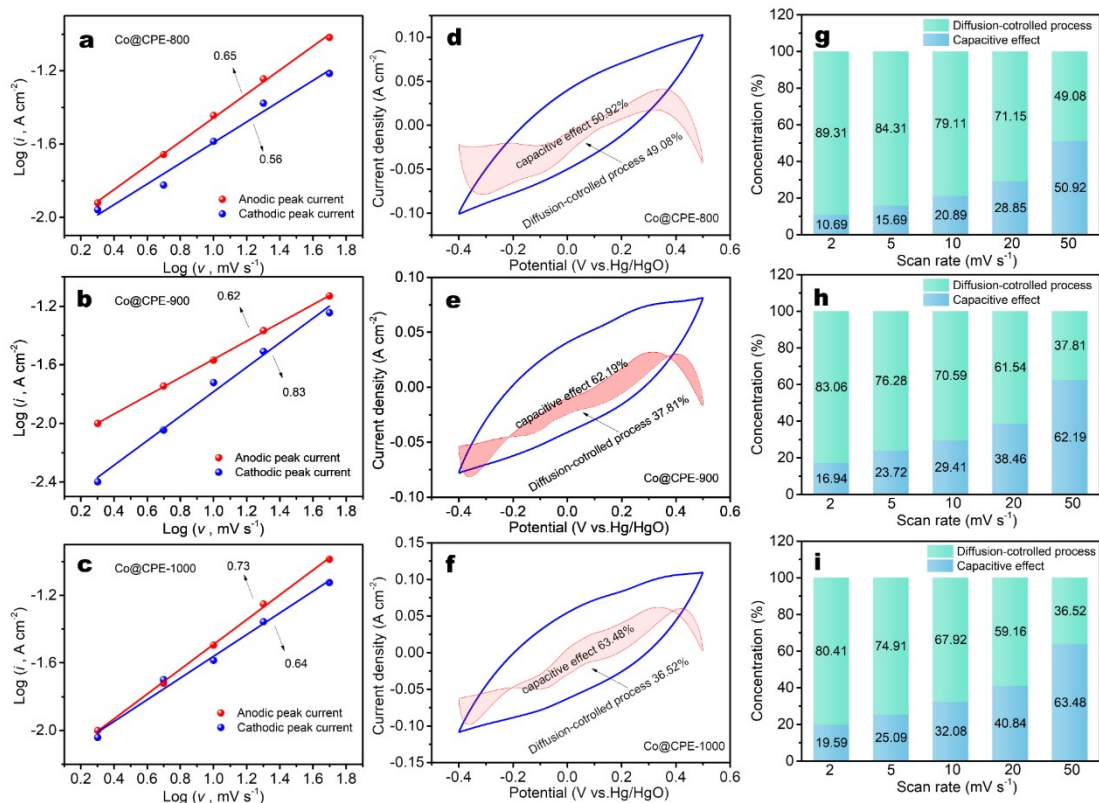

**Fig. S16** The plots of  $i_a$  and  $i_c$  peak current densities as a function of scan rate for the (a) Co@CPE-800, (b) Co@CPE-900, and (c) Co@CPE-1000 electrodes. The contributions of capacitive effect and diffusion-controlled processes to total current for (d) Co@CPE-800, (e) Co@CPE-900, and (f) Co@CPE-1000 electrodes at a scan rate of 50  $\text{mV s}^{-1}$ . Contribution of capacitive effect and diffusion-controlled process to the overall areal capacitance for the (g) Co@CPE-800, (h) Co@CPE-900, and (i) Co@CPE-1000 electrodes.

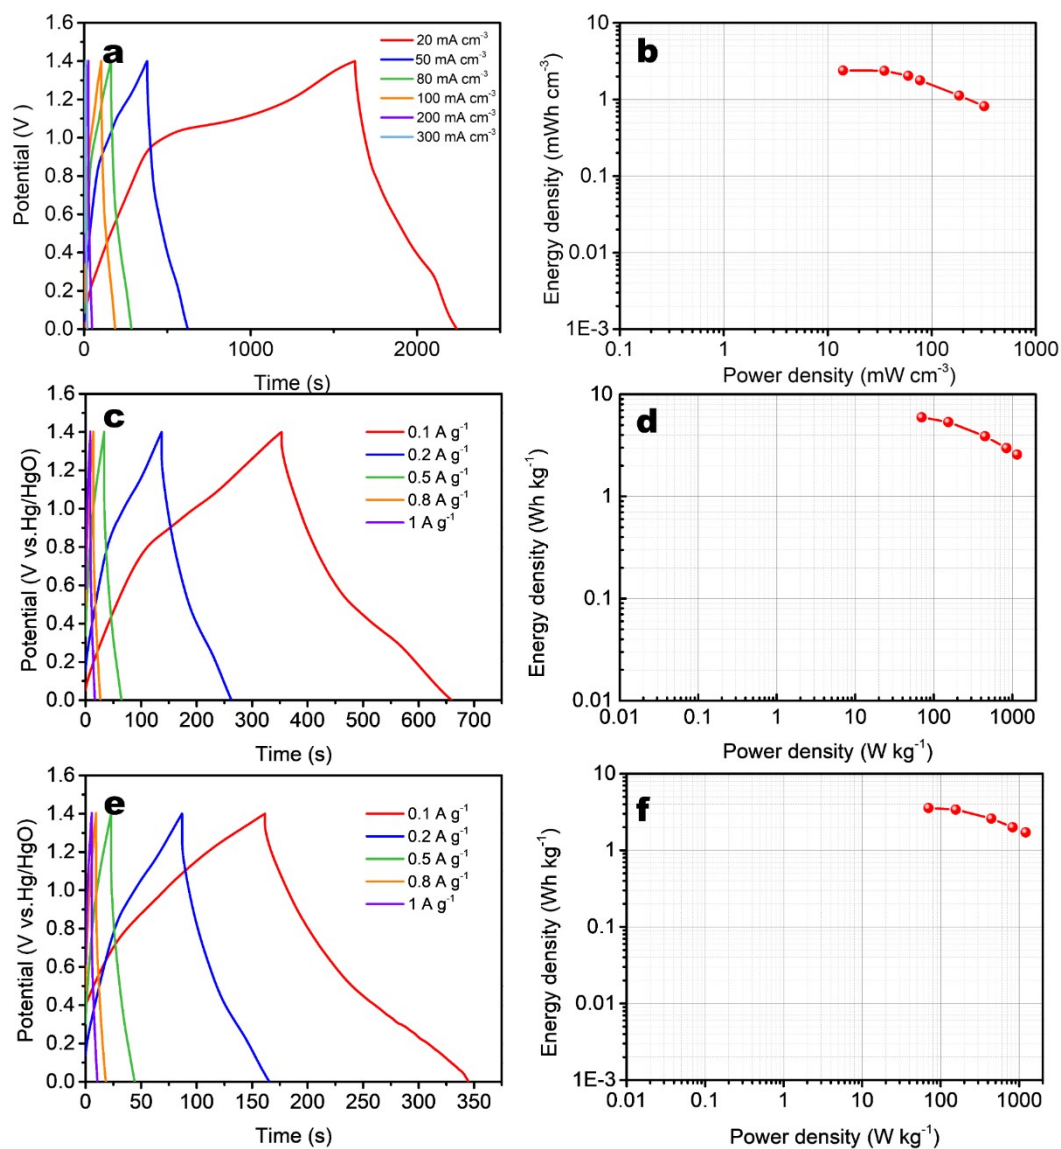

**Fig. S17** (a) GCD curves of Co@CPE-1000-based SC at different current densities. (b) Ragone plot of Co@CPE-1000-based SC. (c) GCD curves of Co@CPE-1000-based SC at different current densities. (d) Ragone plot of Co@CPE-1000-based SC. (based on the loading amounts of  $\text{Co}_2\text{P}$  in the electrodes). (e) GCD curves of Co@CPE-1000-based SC at different current densities. (f) Ragone plot of Co@CPE-1000-based SC. (based on the overall mass of the electrodes).

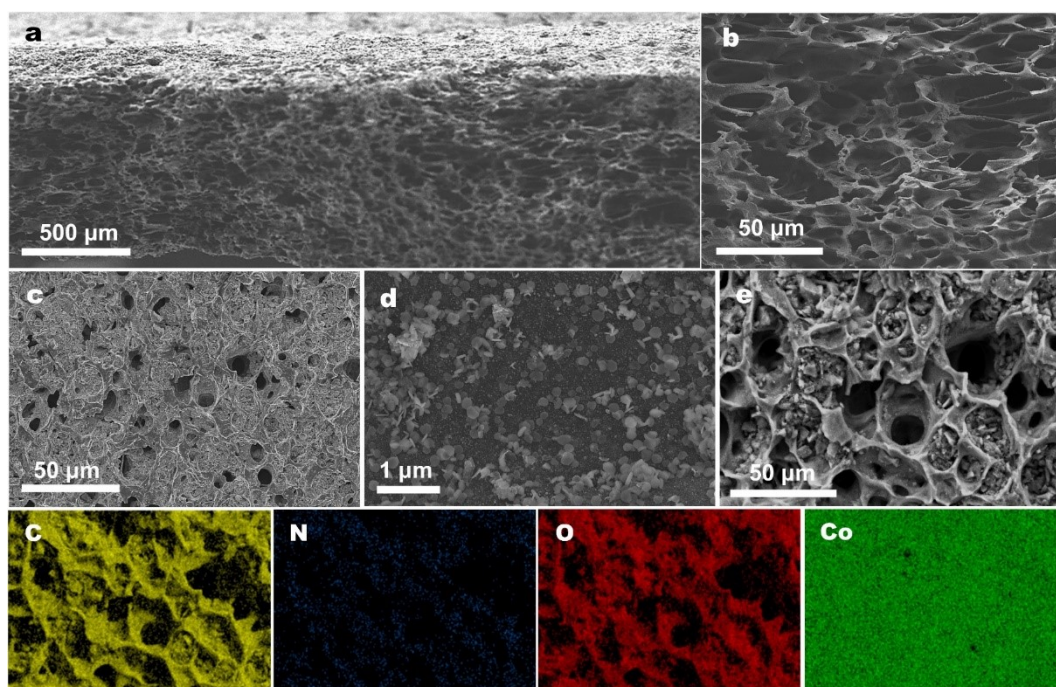

**Fig. S18** (a) SEM image showing the overall view of cycled Co@CPE-1000 electrode. (b) Side -view and (c) top-view SEM images of cycled Co@CPE-1000 electrode. (e) High-magnification SEM image of cycled Co@CPE-1000 electrode. (f) SEM image of cycled Co@CPE-1000 electrode and the corresponding elemental mapping images.

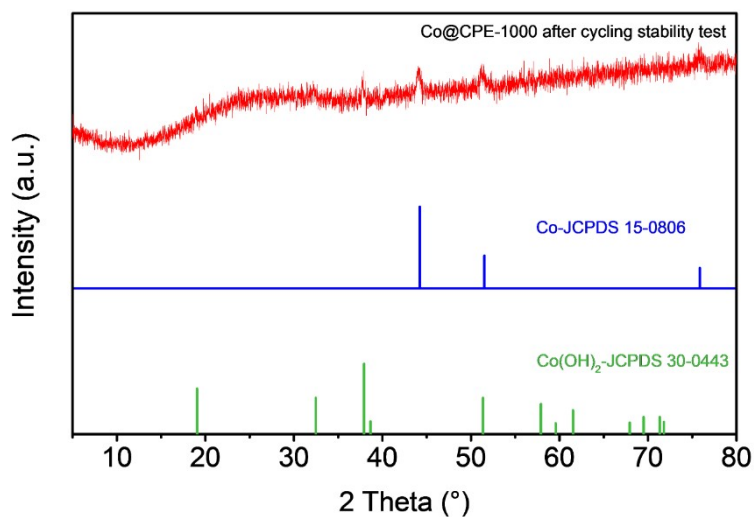

**Fig. S19** XRD patterns of Co@CPE-1000 electrode after the cycling stability test.

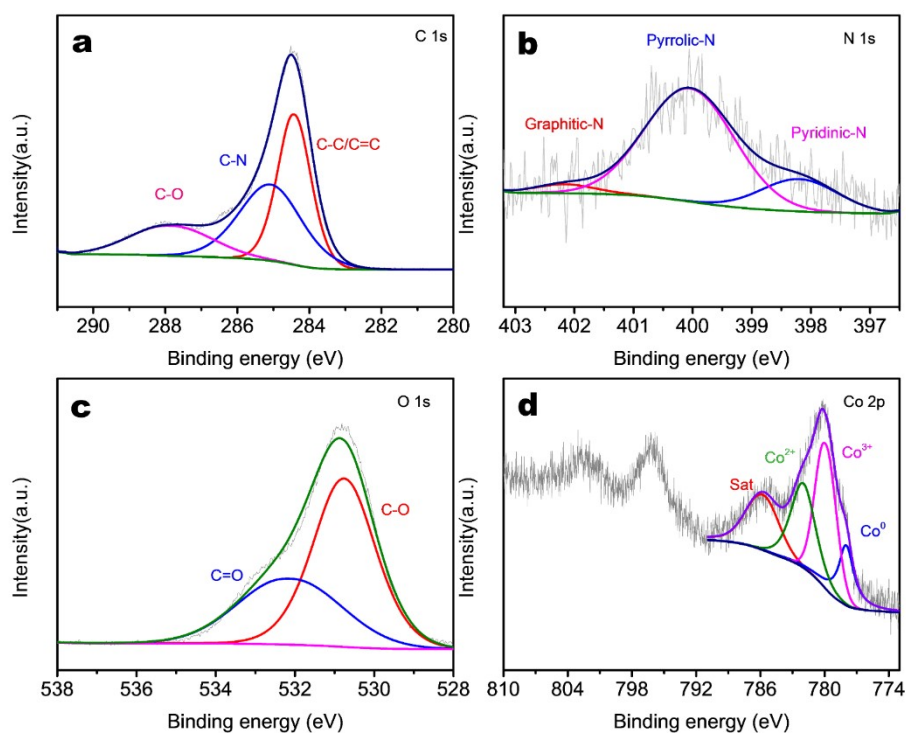

**Fig. S20** (a) C 1s, (b) N 1s, (c) O 1s, and (d) Co 2p XPS spectra of the Co@CPE-1000 electrodes after the cycling stability test.

## Supplementary references

- 1 G. L. Zhu, H. Wen, M. Ma, W. Y. Wang, L. Yang, L. C. Wang, X. F. Shi, X. W. Cheng, X. P. Sun and Y. D. Yao, *Chem. Commun.*, 2018, **54**, 10499-10502.
- 2 C. L. Wang, X. R. Li, W. P. Yang, Y. X. Xu and H. Pang, *Chinese Chem. Lett.*, 2021, **32**, 2909-2913.
- 3 J. H. Zheng, R. M. Zhang, P. F. Yu and X. G. Wang, *J. Alloy Compd.*, 2019, **772**, 359-365.
- 4 T. Kshetri, D. D. Khumujam, T. I. Singh, Y. S. Lee, N. H. Kim and J. H. Lee, *Chem. Eng. J.*, 2022, **437**, 135338.
- 5 I. F. Gul, H. Anwar, M. A. Raza, R. Ahmad, N. Iqbal and G. Ali, *J. Ind. Eng. Chem.*, 2022, **116**, 595-605.

- 6 T. P. Hu, L. L. Gao, W. D. Zhou and J. Zhang, *J. Alloy Compd.*, 2022, **895**,162577.
- 7 H. L. Wu and J. Q. He, *Diam. Relat. Mater.*, 2022, **123**,108912.
- 8 B. R. Ye, M. L. Huang, L. Q. Fan, J. M. Lin and J. H. Wu, *J. Alloy Compd.*, 2019, **776**, 993-1001.
- 9 Y. Song, M. Y. Zhang, T. Y. Liu, T. J. Li, D. Guo and X. X. Liu, *Nanomaterials-Basel*, 2019, **9**, 1110.
- 10 M. G. Radhika, B. Gopalakrishna, K. Chaitra, L. K. G. Bhatta, K. Venkatesh, M. K. S. Kamath and N. Kathyayini, *Mater. Res. Express.*, 2020, **7**,054003.
- 11 R. Ramachandran, C. H. Zhao, D. Luo, K. Wang and F. Wang, *Electrochim. Acta*, 2018, **267**, 170-180.
